# 1 **The recombination landscape of introgression in yeast**

2

3 Enrique J. Schwarzkopf<sup>1</sup>, Nathan Brandt<sup>1</sup>, Caiti Smukowski Heil\*<sup>1</sup>

4

5 Affiliation:

6 <sup>1</sup> Department of Biological Sciences, North Carolina State University, Raleigh, NC

7

8 \*Corresponding author: [cheil@ncsu.edu](mailto:cheil@ncsu.edu)

9

## 10 **Abstract**

11

12 Meiotic recombination is an important evolutionary force that acts by breaking up genomic  
13 linkage, thereby increasing the efficacy of selection. Meiotic recombination is initiated with a  
14 double-strand break which is resolved via a crossover, which involves the reciprocal exchange  
15 of genetic material between homologous chromosomes, or a non-crossover, which results in  
16 small tracts of non-reciprocal exchange of genetic material. While the meiotic process is largely  
17 conserved, crossover and non-crossover rates vary between species, populations, individuals,  
18 and across the genome. In recent years, recombination is observed to be positively associated  
19 with the distribution of ancestry derived from past interspecific hybridization (introgression) in a  
20 variety of species. This trend has been interpreted to signify that introgression carries genetic  
21 incompatibilities that are selected against, such that introgression is enriched in regions of high  
22 recombination. However, recombination is well known to be suppressed in divergent sequence  
23 to prevent non-homologous recombination. Since introgressed DNA is often divergent, we  
24 sought to explore this interaction of recombination and introgression by sequencing spores and  
25 detecting crossover and non-crossover events from two crosses of the budding yeast  
26 *Saccharomyces uvarum*. One cross is between strains isolated from natural environments, and

27 the other cross is between strains from fermentation environments, in which each strain  
28 contains introgression from their sister species, *S. eubayanus*. We find that the recombination  
29 landscape is significantly different between *S. uvarum* crosses, and that most of these  
30 differences can be explained by the presence of heterozygous introgression in the fermentation  
31 cross. Crossovers are significantly reduced and non-crossovers are increased in heterozygous  
32 introgression compared to syntenic regions in the natural cross without introgression. This  
33 translates to reduced allele shuffling within introgressed regions, and an overall reduction of  
34 shuffling on most chromosomes with introgression compared to the syntenic regions and  
35 chromosomes without introgression. Our results indicate that recent hybridization can  
36 significantly influence the recombination landscape, and suggest that the reduction in allele  
37 shuffling contributes to the initial purging of introgressed ancestry in the generations following a  
38 hybridization event.

39

40 **Keywords:** introgression, hybridization, recombination, crossover, non-crossover, yeast,  
41 *Saccharomyces*

42

43

44

45

46

47

48

49

50

51

52

## 53 **Introduction**

54

55 Recombination is the exchange of genetic material between homologous chromosomes during  
56 meiosis and is a staple of eukaryotic sexual reproduction. While the processes involved in  
57 recombination are largely conserved (Arter & Keeney, 2023), recombination rates vary between  
58 sexes, populations, and species (Smukowski & Noor, 2011; Stapley et al., 2017).

59 Recombination rates also vary along the genome, with conflicting patterns of enriched or  
60 depleted recombination in promoter regions and punctate or dispersed recombination  
61 depending on the species (Auton et al., 2013; Rockman & Kruglyak, 2009; Singhal et al., 2015;  
62 Smukowski Heil et al., 2015). These patterns in recombination can affect pairing of alleles after  
63 meiosis—in other words, the shuffling of alleles—in a population. Much of the evolutionary  
64 advantage of recombination is understood to originate from its role in shuffling alleles, which  
65 increases the number of different allele combinations segregating in a population. The increase  
66 in allele combinations can reduce selection interference—the effect that genetically linked sites  
67 have on the evolutionary fate of either beneficial or deleterious alleles (Felsenstein, 1974; Hill &  
68 Robertson, 1966; McDonald et al., 2016; McGaugh et al., 2012).

69

70 How much allele decoupling is produced by recombination will depend on the type of  
71 recombination event. Each recombination event begins with the severing of both strands of a  
72 sister chromatid of one of the homologous chromosomes in what is referred to as a double-  
73 strand break (DSB) (Keeney, 2001). The distribution of DSBs is influenced by a variety of  
74 factors, many of which are organism-dependent, but often include decreases of DSBs near  
75 telomeres and centromeres as well as increases in genomic regions enriched for GC content,  
76 CpG sites, and depleted of methylation (CpG islands) and near promoter regions (de Massy,  
77 2013; Lam & Keeney, 2015; Pan et al., 2011; Zelkowski et al., 2019). When a DSB occurs, the  
78 homologous strand is recruited to repair the break, and during this process genetic information

79 is exchanged. The most evident and widely studied resolution of a DSB is a crossover (CO),  
80 where all the genetic information on one side of the DSB from one homologous chromosome is  
81 spliced with all the genetic information on the other side of the DSB from the other homologous  
82 chromosome. DSB resolution can also involve gene conversions—or non-crossovers (NCOs)—  
83 which result in one small segment (typically 100-2000 bp) of a homologous chromosome's  
84 genetic information being copied onto the other (Chovnick et al., 1971; Hilliker et al., 1994;  
85 Jeffreys & May, 2004; Judd & Petes, 1988). DSBs can be resolved through both of these  
86 processes in a single instance, and even more than one NCO can occur at a single break point.  
87 Each possible resolution can produce a variety of genetic patterns at the site of a DSB. COs  
88 generally produce more allele shuffling, and therefore degrade linkage faster than NCOs,  
89 because they recombine all loci from one side of the event with all loci on the other side.  
90 However, NCOs can occur in regions where COs are typically suppressed, like centromeres  
91 and inversions (Korunes & Noor, 2019; Mancera et al., 2008; Miller et al., 2016; Schaeffer &  
92 Anderson, 2005; Shi et al., 2010; Talbert & Henikoff, 2010; Wijnker et al., 2013). NCOs are also  
93 crucial to reducing linkage within coding regions and, unlike COs, result in 3:1 allele ratio in the  
94 meiotic product at heterozygous sites, potentially changing allele frequencies (Korunes & Noor,  
95 2017).

96  
97 The number of DSBs that occur per meiosis varies by species, as does the number of DSBs  
98 that are repaired as COs or NCOs (de Massy, 2013; Korunes & Noor, 2017). In *Arabidopsis* and  
99 maize, several hundred DSBs are resolved into only a handful of COs, whereas in  
100 *Saccharomyces cerevisiae* the CO:NCO ratio is close to 2:1 (Choi et al., 2018; He et al., 2017;  
101 Mancera et al., 2008). How CO:NCO resolution may be evolving is not well understood, but  
102 evidence from *Saccharomyces* suggests that the DSB landscape is well conserved across  
103 species, while recombination rates significantly differ between sister species *S. cerevisiae* and  
104 *S. paradoxus* (Lam & Keeney, 2015; Liu et al., 2019). This suggests that alternate resolution of

105 DSBs may be important in altering recombination rates between closely related species. This is  
106 further supported by the finding that several genes involved in the CO vs. NCO decision of DSB  
107 resolution show evidence of rapid evolution and directional selection in mammals (Dapper &  
108 Payseur, 2019), and that some of these genes are linked to variation in recombination rates  
109 within and between species (Brand et al., 2018; Kong et al., 2008; Murdoch et al., 2010; Yang et  
110 al., 2015).

111  
112 Variation in the number and distribution of COs and NCOs, and their respective associated  
113 effects on linkage, have important implications for molecular evolution. Recombination has long  
114 been appreciated to play a role in the distribution of various genomic features including  
115 nucleotide diversity. Nucleotide diversity has a positive correlation with recombination rate in a  
116 number of species, interpreted to result from selective sweeps and background selection  
117 removing genetic variation in regions of low recombination (Begun & Aquadro, 1992;  
118 Charlesworth et al., 1993; Smith & Haigh, 1974). Similarly, recombination breaking up genetic  
119 associations is particularly notable in the context of interspecific hybridization. In first-generation  
120 ( $F_1$ ) hybrids, each set of homologous chromosomes is composed of sister chromatids carrying  
121 genetic information from one of the parents. Since no recombination has physically separated  
122 any alleles on the chromosome at the hybrid  $F_1$  stage, each parent's genetic contribution is  
123 perfectly linked. If the hybrids then back-cross to one of the parental populations, recombination  
124 will produce genomes that are a mosaic of genetic information from the two populations  
125 (introgression) (Aguillon et al., 2022). Recombination drives the pattern of fragmentation in the  
126 introgressed regions over time, and therefore plays an important role in the distribution of  
127 introgressed DNA in a population (Barton & Bengtsson, 1986; Butlin, 2005; Moran et al., 2021;  
128 Nachman Michael W. & Payseur Bret A., 2012; Schumer et al., 2018; Veller et al., 2023). When  
129 each population has evolved alleles that are deleterious when present in the background of the  
130 other population (the Dobzhansky-Muller hybrid incompatibility model) we expect introgressed

131 regions with low rates of recombination to be quickly purged from the population, as the  
132 accumulation of incompatible alleles incurs a steep fitness cost. In contrast, when introgressed  
133 regions have high recombination rates, the break up of genetic associations will reduce  
134 selective interference between the incompatible alleles and their surrounding haplotypes,  
135 allowing for neutral and beneficial alleles brought in with the introgression to escape the fate of  
136 neighboring incompatibilities (Moran et al., 2021; Schumer et al., 2018). This theory is  
137 supported empirically through enrichment of introgressed segments in regions of higher  
138 recombination in a number of organisms including *Mimulus*, maize, butterflies, swordtail fish,  
139 stickleback, and humans (Brandvain et al., 2014; Calfee et al., 2021; Edelman et al., 2019;  
140 Martin et al., 2019; Ravinet et al., 2018; Schumer et al., 2018).

141  
142 This positive correlation between introgressed ancestry and recombination is emerging as a  
143 nearly ubiquitous pattern (though see (Dagilis & Matute, 2023; Duranton & Pool, 2022; Pool,  
144 2015)), however, it is unclear how these observations relate to the known effect of sequence  
145 divergence on DSB resolution. Introgression, particularly between highly diverged species, can  
146 have low sequence homology with the genomic region it is replacing. A DSB in a region of low  
147 homology will recruit mismatch repair proteins, which ensure COs are occurring between  
148 homologous chromosomes and at equivalent positions to prevent ectopic recombination (Harfe  
149 & Jinks-Robertson, 2000; Hunter et al., 1996). Mismatch repair proteins reduce the frequency of  
150 CO events as sequence divergence increases (Chen & Jinks-Robertson, 1999; Cooper et al.,  
151 2021; L. Li et al., 2006; Welz-Voegele & Jinks-Robertson, 2008). Given that heterozygous  
152 introgression will have divergent sequences, we expect a decrease in COs, and possibly an  
153 increase in NCOs as DSBs fail to be resolved as COs in introgressed regions .

154  
155 To help us understand this interaction of introgression and recombination, and identify patterns  
156 in CO and NCO in closely related populations, we utilized the budding yeast *Saccharomyces*.

157 Yeasts provide an excellent opportunity to study DSB resolution, as we can readily isolate and  
158 collect all four meiotic products of a given meiosis and detect both CO and more elusive NCO  
159 events (Figure 1A) (Brion et al., 2017; Gerton et al., 2000; Liu et al., 2018, 2019; Mancera et al.,  
160 2008). Recombination rates vary between strains of *S. cerevisiae* (Cubillos et al., 2011; Raffoux  
161 et al., 2018) and between *S. cerevisiae* and its sister species *S. paradoxus* (Liu et al., 2019;  
162 Tsai et al., 2010). Strains of different *Saccharomyces* species have often hybridized with other  
163 species and carry introgressed DNA from these events (Albertin et al., 2018; Almeida et al.,  
164 2014; Bendixsen et al., 2022; D'Angiolo et al., 2020; Langdon et al., 2019; Stelkens &  
165 Bendixsen, 2022; Tellini et al., 2023).

166  
167 In this study, we look at patterns of recombination and introgression at the population level by  
168 crossing two pairs of Holarctic *Saccharomyces uvarum* strains. One pair of strains was isolated  
169 from natural environments in North America and the other pair was isolated from European  
170 fermentation environments (Almeida et al., 2014). The *S. uvarum* strains isolated from  
171 European fermentation environments each carry introgression from their sister species,  
172 *Saccharomyces eubayanus*, which is approximately 6% divergent from *S. uvarum* (Almeida et  
173 al., 2014; Langdon et al., 2020; Nespolo et al., 2020). The diploid F<sub>1</sub> genome of these strains is  
174 heterozygous for nine different introgressions which make up approximately 10% of the genome  
175 (Figure 1B). The strains from the North American cross do not carry *S. eubayanus*  
176 introgression, thus allowing us to assess the impact of introgression on the recombination  
177 landscape. We obtained whole genome sequencing data from individual meiotic events from the  
178 first offspring generation of each cross and used this data to detect CO and NCO events along  
179 the genome (Figure 1A). From these maps, we aim to understand (i) how patterns of CO and  
180 NCO differ between closely related strains, (ii) how regions of introgression differ in their CO  
181 and NCO patterns, and (iii) how these different patterns affect shuffling of alleles locally and at

182 the chromosome level. Understanding these objectives will provide us novel insights into how  
183 introgression impacts the recombination landscape.

184

## 185 **Methods**

186

### 187 *Strain and library construction*

188

189 *S. uvarum* strains (UCD61-137, yHCT78 , GM14, and DBVPG7787) were obtained from the  
190 Portuguese Yeast Culture Collection and from Chris Hittinger (Table S1) (Almeida et al., 2014).

191 All four *S. uvarum* strains had their *HO* locus replaced with a kanMX marker using a modified  
192 version of the high-efficiency yeast transformation using the LiAc/SS carrier DNA/PEG method.

193 Briefly, the kanMX marker was amplified from plasmid pCSH2 with homology to genomic DNA  
194 flanking the HO ORF with primers CSH239

195 (GGTGGAAAACCCACGAAAAGTTAGAACTACGTTTCAGGCAAAGacatggaggcccagaatac) and

196 CSH241 (GTGACCGTATTGGTACTTTTTTTGTTACCTGTTTTAGTAGcagtatagcgaccagcattc).

197 For each strain, overnight cultures were inoculated in 25 mL of YPD at an OD of ~ 0.0005 and  
198 incubated at room temperature on a shaker for ~24 hours until the cultures reached an OD

199 between 0.6 and 0.9. Subsequently, 1 ug of the template DNA was transformed with a heat  
200 shock temperature of 37°C for 45 minutes. The transformed cells were allowed to recover in

201 liquid YPD for 4 hours before being plated onto G418 selective plates and incubated at room  
202 temperature for 2 days.

203

204 Single colonies were selected from the transformation plates, restreaked onto G418 plates and  
205 allowed to grow at room temperature for 2 days. Single colonies from those plates were then

206 inoculated into 2 mL of YPD + G418 and incubated in a roller drum at room temperature

207 overnight. From those cultures, 250 uL was used to inoculate 2 mL of sporulation media (1%



208 potassium acetate, 0.1 % yeast extract, 0.05% dextrose) and incubated at room temperature for  
209 3 to 5 days. Strains were confirmed to have the ho::KanMX via tetrad dissection on a Singer  
210 SporPlay+ microscope (Singer Instruments). Plates with tetrads were incubated at room  
211 temperature for 2 days and then replica plated to test for proper segregation of the kanMX  
212 marker and mating type within individual tetrads.

213

214 Crosses between strains UCD61-137 and yHCT78 (natural cross), and between strains GM14  
215 and DBVPG7787 (fermentation cross) were set up by micromanipulation of single MATa and  
216 MATx cells using a Singer SporPlay+. The plates were incubated at room temperature for 2  
217 days and then replica plated to mating type tester strains to test for potential diploids. Identified  
218 diploids were then sporulated by growing a culture of the cross in 2 mL YPD + G418 at room  
219 temperature overnight. From those cultures, 250 uL were used to inoculate 2 mL of sporulation  
220 media and incubated at room temperature for 3 to 5 days. Sporulated cultures were dissected  
221 on 3 YPD plates (24 tetrads per plate) using a Singer SporPlay+. Fifty of the fully viable tetrads  
222 were selected and had all their spores inoculated into YPD (200 spores total) and incubated at  
223 room temperature. The DNA was extracted from these cultures using a modified version of the  
224 Hoffman-Winston DNA Prep (Hoffman & Winston, 1987). The DNA concentration was then  
225 measured using SYBR green, and 150 ng of each sample's DNA was used to prepare a  
226 sequencing library using an Illumina DNA Prep Kit, modified to use half the normal amounts of  
227 reagents. Libraries were pooled and run on an Illumina NovaSeq 500 with 150bp paired end  
228 reads.

229

### 230 *Calling SNPs*

231

232 We scored SNPs from parents and offspring using the *S. uvarum* reference genome (Scannell  
233 et al., 2011) and custom scripts that invoked bwa (v0.7.17), samtools (v1.12), bcftools (v1.13),

234 picardtools (v2.25.6), and gatk (v4.2.0.0) (Danecek et al., 2021; H. Li & Durbin, 2009; McKenna  
235 et al., 2010). The custom scripts are available in the github repository: *ejschwarzkopf/CO-NCO*.  
236 We joint genotyped parents and offspring with default filters for gatk with the exception of the  
237 QUAL filter, which was set as < 100 for parents and < 30 for offspring. We further filtered  
238 variants by requiring they be fixed differences between the two parental strains. We kept a total  
239 of 24,574 markers for the natural cross and 74,619 markers for the fermentation cross. We  
240 utilized LUMPY to identify structural variants in the parent strains that were greater than 5000  
241 bp and verified calls using the Integrative Genomics Viewer (Layer et al., 2014; Robinson et al.,  
242 2011). We identified three amplifications in strain GM14 (one of the fermentation cross parents)  
243 that were absent in other strains (Table S2).

244

#### 245 *Generating CO/NCO maps*

246 We generated “seg” files by coding tetrad variants by their parental origin. These seg files were  
247 the input for CrossOver (v6.3) from the ReCombine suite of programs, which we used to detect  
248 COs and NCOs (Anderson et al., 2011). We then filtered to remove non-crossovers with fewer  
249 than three associated markers and split the genome into 20kb windows. In each window we  
250 counted crossovers, non-crossovers, and markers. We established regions of introgressions  
251 through visual inspection of marker density in the fermentation cross (introgressions showed  
252 more divergence between fermentation strains) and confirmed them using the findings of  
253 Almeida et al. (2014). We found nine heterozygous introgressions on chromosomes 4, 6, 7, 9,  
254 10, 10, 13, 14, and 15 respectively that we included in further analyses (Table S3). We excluded  
255 two additional introgressions due to poor mapping (chromosome 13:0-17,000; chromosome 16:  
256 642,000-648,000). To account for the difference in number of markers in introgressed vs non-  
257 introgressed windows and their effect on NCO detection, we applied a previously published  
258 simulation-based method (Liu et al., 2019; Wijnker et al., 2013). Choosing an average NCO

259 tract length of 2kb, we simulated 1000 NCO events per window to establish our expected  
260 probability of detecting an NCO event in that window. We then divided our observed NCO count  
261 by our probability of detecting an NCO event. COs that occurred in large regions devoid of  
262 markers would be called in the middle of the empty windows. We decided to deal with this by  
263 splitting CO counts in regions with multiple consecutive windows without markers evenly  
264 between the empty windows. With these corrected maps, we calculated spearman correlations  
265 between crosses using R (v4.1.0, R Core Team 2021). Additionally, we modeled NCO and CO  
266 count as a function of introgression, introgression by cross, and GC content using a gaussian  
267 generalized linear model in R (v4.1.0, R Core Team 2021).

## 268 *Homology*

269

270 We calculated homology between the two fermentation cross strains in 51bp windows with 25bp  
271 overlaps. At each nucleotide position in the window, we counted fixed differences as zero  
272 homology, invariant sites between strains as full homology (1), and polymorphic sites in either or  
273 both strains as half homology (0.5). We then averaged these homology values across the  
274 window. This measure represents the probability that both strains will have the same nucleotide  
275 base at a given position. We used this measure of fine-scale homology to determine how  
276 homology related to NCO counts in introgressed regions. For this, we used Loess regressions  
277 and Spearman's correlations on each of the introgressed regions comparing homology to NCO  
278 count, both implemented in R (v4.1.0, R Core Team 2021). We then focused on each  
279 recombination event (CO or NCO) and compared the homology 100bp up and downstream of  
280 CO breakpoints and 100bp up and downstream of NCO tracts. We then used Welch's two  
281 sample t-tests to compare CO and NCO homology in each introgression.

282

283

284

285 We use  $r$ , a measure genetic shuffling defined in Veller et al. (2019) to measure how much  
286 shuffling occurs in each chromosome for each cross. Our data provides parental origin for each  
287 fixed difference between parental strains. We assume that all loci between pairs of markers that  
288 come from the same parent are also from that parent. We also assume that when a pair of  
289 successive markers come from different parents, the location of the change from one parental  
290 origin to the other happens at the midpoint between our markers. With this in mind, we counted  
291 the number of bases that come from one parent and divided by the chromosome size to obtain  
292 the proportion of the chromosome that was inherited from said parent ( $p$ ) and used the formula  
293 from Veller et al. (2019):  $r = 2p(1 - p)$ . We calculated  $r$  for each full chromosome and each  
294 introgressed regions in every gamete from both crosses. We then averaged across gametes to  
295 obtain average  $r$  values. We then compared average  $r$  between crosses in each chromosome  
296 or introgressed region using Welch two sample t-tests and correcting for multiple tests using a  
297 Bonferroni correction in R (v4.1.0, R Core Team 2021).

298

299 *Data availability*

300

301 Sequences for the parental strains can be found on NCBI SRA (SRR1119189, SRR1119180  
302 SRR1119199, SRR1119200) (Almeida et al., 2014). Sequencing of the tetrads is deposited at  
303 NCBI SRA under Project PRJNA1061120.

304

305 **Results**

306

307 *The recombination landscape differs dramatically between closely related crosses*

308 We isolated and sequenced products of 48 meioses (192 haploid spores) for two crosses of *S.*  
309 *uvarum*, a cross between strains isolated from North America (natural cross) and a cross  
310 between strains isolated from Europe (fermentation cross). We detected COs and NCOs across  
311 the 16 nuclear chromosomes of *S. uvarum*. Genomewide, we found significantly more COs on  
312 average in the natural cross (82.54 COs/meiosis, SE 1.5; 0.72 cM/kb) than in the fermentation  
313 cross (63.66 COs/meiosis, SE 1.9; 0.55 cM/kb) but no significant difference when comparing the  
314 average number of NCOs between the natural cross (60.44 NCOs/meiosis, SE 2.7) and the  
315 fermentation cross (68.1 NCOs/meiosis, SE 12.47). The number of COs per meiosis in the  
316 natural and fermentation crosses are slightly higher than those of *S. paradoxus* (54.8) and *S.*  
317 *cerevisiae* (76.5) respectively, but both crosses have NCO averages higher than those of *S.*  
318 *cerevisiae* (46.4) and *S. paradoxus* (26.9) (Figure 2A; Tables S4 & S5; Liu et al. 2019). The  
319 significant difference in COs per meiosis between our fermentation and natural crosses was  
320 unexpected, as we predicted that the recombination landscape would be more similar within a  
321 species (*S. uvaum*) than between species *S. cerevisiae* and *S. paradoxus*.

322 To further explore the differences in recombination landscapes between our crosses, we split  
323 the genome into 20kb, non-overlapping windows, and obtained CO, NCO, and marker counts  
324 for each region (Figure 2D). We corrected for differences in marker resolution between crosses  
325 (see Methods). We found modest, but significant genomewide correlation between our crosses  
326 for both COs (Spearman's correlation: 0.273;  $p < 0.0001$ ) and NCOs (Spearman's correlation:  
327 0.1456;  $p < 0.001$ ). Again, these correlations were unexpectedly lower than those reported by Liu  
328 et al. (2019) between *S. cerevisiae* and *S. paradoxus* (0.48 for COs and 0.17 for NCOs).

329 We hypothesized that the low correlations between crosses might be impacted by the presence  
330 of heterozygous introgression from *S. eubayanus* in the fermentation cross. To explore this  
331 possibility, we separated the 20kb windows into introgressed and non-introgressed windows  
332 (based on whether they overlapped with an introgressed region). We will refer to introgression in

333 the fermentation cross as “introgression” and use the term “introgressed region” to refer  
334 generally to the syntenic region, regardless of which cross we are focusing on. We calculated  
335 Spearman’s correlations of COs, NCOs, and marker counts between the two crosses for each  
336 chromosome. We find positive correlations between CO counts for all chromosomes when  
337 looking at non-introgressed regions (though some were not significant; Table S6). For  
338 introgressed regions, we found no significant CO correlations between crosses, which is  
339 consistent with the hypothesis that CO landscapes are changed in introgression (Table S7).  
340 There was one significant, highly positive correlation among NCOs (chromosome 1), but all  
341 other correlations were not significant. This was likely affected by the fact that markers used to  
342 detect NCOs are very differently distributed between the crosses, and the small size of NCO  
343 tracts means regions with more markers tend to reveal more NCOs.

344 We find that introgressions tend to have lower CO counts and higher NCO counts in the  
345 fermentation cross when compared to syntenic regions in the natural cross. The fermentation  
346 cross has fewer COs than the natural cross overall, but the difference is greater in the  
347 introgressed regions (Figure 2B-C). To further explore and test possible explanations for the  
348 patterns of COs and NCOs in introgressed regions, we constructed linear models for CO and  
349 NCO counts. Our model of CO counts showed a significant positive effect of the interactions  
350 between natural cross and introgression (whether a genomic window is from the natural cross  
351 and whether that window is in an introgressed region), as well as a significant negative effect of  
352 introgression on the number of COs, and a significant positive effect of GC content on CO count  
353 (Table 3). These results are consistent with increased COs in GC-rich regions and reduced  
354 COs in introgressions. Our linear model of NCO counts showed a similar positive effect of GC  
355 content on NCO counts, but showed opposite significant coefficients for the other two  
356 explanatory variables (Table 4). This indicates that GC content still plays an important role in

357 localizing NCOs, and supports our findings that patterns of NCOs in introgressed regions are  
358 opposite to those of COs.

359 *Reduced sequence homology helps explain non-crossover resolution of DSBs in introgressions*

360 One possible explanation for an increase of NCOs in introgressions is that the reduced  
361 homology is biasing DSBs in the region to be resolved as NCOs rather than COs. We would  
362 therefore expect to see NCOs to be negatively correlated with homology. To evaluate the  
363 relationship of homology to the CO and NCO landscapes in introgressions, we measured  
364 homology, NCO depth, and CO count in 101 bp sliding windows along each of the  
365 introgressions. Mismatch repair proteins in *Saccharomyces* seem to suppress COs with very  
366 little mismatch in small regions (~350 bp), which informed our window size (Chen & Jinks-  
367 Robertson, 1999; Datta et al., 1997). We counted the number of NCO tracts that intersect with  
368 each window as a measurement of NCO depth, and simply counted the CO events in a given  
369 window. We measured homology in the sliding windows by measuring the proportion of bases  
370 that are expected to match between the two parent strains (Figure 3). We then ran Spearman's  
371 correlations and a loess regression along each introgression and found a weak, but often  
372 significant ( $p < 0.001$ ) correlation between NCOs and homology in the introgression (Table 1),  
373 suggesting that resolution of double strand breaks is biased towards NCOs when homology is  
374 low. From the loess regression, we can observe an increase in NCO as homology reduces until  
375 about 0.9-0.8 homology, at which point NCOs level out or reduce. However, this effect is very  
376 weak with respect to the NCO counts, and at low levels of homology the uncertainty of the  
377 regression line is very large. This is primarily driven by the number of windows with no NCOs  
378 (Figure 4).

379 The low CO count in introgressed regions leaves us unable to investigate effects of homology  
380 on CO counts except on chromosomes 7 and 14, where we found significantly higher homology  
381 around COs than around NCOs (Table 2). The introgressions on these two chromosomes are

382 unique in that they contain a highly homologous portion of sequence and therefore contain  
383 enough COs for us to have power to detect differences between CO and NCO neighborhoods  
384 (Figure 3).

385 *Introgression decreases allele shuffling locally and at the chromosome level*

386 Because NCOs still play a small role in shuffling alleles along the chromosome, we were  
387 interested in whether the increase in NCOs of the fermentation cross would supplement the lost  
388 shuffling from the suppression of COs in the introgressions. To test this hypothesis, we used the  
389 measure  $\underline{r}$ , which accounts for the number and positioning of recombination events to estimate  
390 the probability that a randomly chosen pair of loci shuffles their alleles in a gamete (Veller et al.,  
391 2019). We calculated the average  $\underline{r}$  per chromosome and for each introgressed region for each  
392 of the two crosses. We observed high levels of shuffling at the chromosome level when  
393 compared to humans. The intra-chromosomal component of  $\underline{r}$  in humans is 0.0135 in females  
394 and 0.0177 in males (Veller et al., 2019), while our measurements for chromosomes varied  
395 between 0.216 and 0.426. We find that most chromosomes do not have a significantly different  
396 amount of allele shuffling between the two crosses, even though the natural cross generally has  
397 more COs (Table S8; Bonferroni-adjusted  $\alpha = 0.00313$ ). However, of the six chromosomes with  
398 significantly different  $\underline{r}$  values, all of them showed more shuffling in the natural cross, and five of  
399 the six (chromosomes 4, 9, 10, 14, and 15) contained introgressed regions (Figure 5).

400 Chromosome 12 was the only chromosome without an introgressed region to have significantly  
401 different shuffling between crosses, and it also showed more shuffling in the natural cross. All of  
402 the introgressed regions showed significantly more shuffling in the natural cross, indicating that  
403 the large increase of NCOs in the introgressions does not make up for the loss of shuffling from  
404 the depletion of COs (Table S9; Bonferroni-adjusted  $\alpha = 0.00556$ ). This finding indicates that an  
405 introgression that is segregating in a population will incur a shuffling cost in heterozygous  
406 individuals on top of any other evolutionary effects the introgression may have.



407

## 408 **Discussion**

409

410 Our study is motivated by understanding recombination rate variation within a species and  
411 uncovering potential genetic factors underlying this variation. To investigate this question, we  
412 crossed two pairs of *S. uvarum* strains, one pair isolated from natural environments and one  
413 pair from fermentation environments, and explored the distribution of CO and NCO events from  
414 both crosses. We found a similar range of COs per meiosis as previous studies in *S. cerevisiae*  
415 and *S. paradoxus* (Liu et al., 2019; Mancera et al., 2008). The number of NCOs detected,  
416 however, was considerably higher, despite having less sequence differences between strains in  
417 each of our crosses and therefore lower genomic resolution for detection. We also detected  
418 more COs and fewer NCOs in our natural cross when compared to our fermentation cross.

419

420 We hypothesized that these differences in the recombination landscape were influenced by  
421 introgression, given that heterozygous introgression creates sequence divergence, and that  
422 COs in regions of lower homology are known to be curtailed (Chen & Jinks-Robertson 1999, Li  
423 et al. 2006, Wetz-Voegele & Jinks-Robertson 2008, Cooper et al. 2021). We therefore explored  
424 the relationship between introgressions and the differences in CO and NCO counts between  
425 crosses. Our correlations between crosses, though mostly not significant, pointed to more CO  
426 distribution differences in introgressed regions than in the rest of the genome. When we then  
427 modeled CO and NCO locations, correcting for GC content (a well characterized driver of  
428 recombination events (Kiktev et al., 2018; Marsolier-Kergoat & Yeramian, 2009)), we found that  
429 the distribution of COs and NCOs we observed was well explained by introgressions. While we  
430 are limited in our interpretations by only comparing two crosses (one cross with heterozygous  
431 introgression and one without introgression), these results are in line with findings in inversions,  
432 where heterozygotes show sharp decreases in COs and an increase in NCOs in the inverted

433 region (Crown et al., 2018; Korunes & Noor, 2019). However, unlike heterozygous inversions  
434 where an increase in COs is observed on freely recombining chromosomes (the inter-  
435 chromosomal effect), we do not see an increase in COs outside of introgression or on  
436 chromosomes without introgression.

437

438 One likely effect of this CO reduction is a reduction in shuffling at the regional and chromosomal  
439 level. While NCOs can increase local shuffling, they likely have a much weaker effect on the  
440 likelihood of two random alleles being shuffled than COs do. We find this is the case for our two  
441 crosses, where despite a large number of NCOs in introgressions, the amount of shuffling (as  
442 measured by  $r$ ) is significantly lower in the fermentation cross. This loss of shuffling translates  
443 to frequently lower  $r$  in the fermentation cross at the chromosome level for chromosomes  
444 containing introgressions. Lower  $r$  is not observed when introgressions are small and near  
445 telomeres, while even a small introgression near the center of the chromosome can lead to a  
446 large reduction in  $r$  (as is the case for chromosome 15). This is consistent with the expectation  
447 that COs near the center of chromosomes generate much more shuffling of alleles than terminal  
448 COs (Veller et al., 2019). Our findings indicate that reducing COs, especially near the center of  
449 chromosomes, has a cost to shuffling that is not compensated by the increase of NCOs that we  
450 observe. If the benefit of recombination is its ability to generate new combinations of alleles,  
451 then the loss of shuffling resulting from being heterozygous for divergent DNA sequences may  
452 come at an additional cost beyond the possibilities of genetic incompatibilities between  
453 hybridizing species. This cost is likely higher as divergence increases and as the length of  
454 divergent sequences is greater, as is the case with early generation hybrids (Dagilis & Matute,  
455 2023). Ultimately, if sequence divergence is too high, the resultant failure to recombine can  
456 become a postzygotic reproductive barrier (Bozdog et al., 2021; Hunter et al., 1996; Rogers et  
457 al., 2018).

458

459 The shuffling cost to introgression that we identify in our crosses may play an important role in  
460 the fate of introgression in the generations following hybridization. When heterozygotes for an  
461 introgression are formed, the reduction in shuffling inside the introgression will increase the  
462 likelihood that the introgression is purged from the population. This is because it will likely be  
463 inherited in its entirety and will carry the fitness cost of incompatibilities combined with a cost of  
464 shuffling. This cost is incurred because the reduction of COs in the introgression will reduce  
465 shuffling of alleles on either side of it and will vary in its intensity depending on the location and  
466 size of the introgression. In generations immediately following hybridization, introgressions will  
467 be much larger and are therefore expected to be more costly (although this likely depends on a  
468 number of factors including time since divergence). These predictions are consistent with  
469 modeling and empirical data on the purging of introgression in *Drosophila* and humans in the  
470 first generations following hybridization (Veller et al., 2023).

471

472 As to longer term dynamics of recombination and selection, we predict that the excess NCOs  
473 detected in heterozygous introgressions should begin to erode the divergence between the  
474 sequences, increasing homology and slowly reducing the cost of the introgression. This  
475 hypothesis posits that recombination can act to remove the larger, more deleterious regions of  
476 an introgression quickly while whittling away slightly deleterious alleles that may be linked to any  
477 beneficial regions of an introgression. However, in our current study, we are limited by only  
478 observing one generation of sexual reproduction between two pairs of strains. This means that  
479 we don't capture longer term patterns of recombination or the landscape of recombination in  
480 introgressions that are segregating in a population. Consequently, our findings do not reflect the  
481 effects of long-term selection (and hypothesized degradation of sequence divergence through  
482 NCO) that would lead to introgressions preferentially remaining in high-CO regions, as has been  
483 observed in other organisms. Furthermore, *Saccharomyces* typically reproduce asexually, with

484 only infrequent sexual cycles (Magwene et al., 2011; Ruderfer et al., 2006; Zeyl & Otto, 2007).  
485 When they do mate, they often mate within a tetrad resulting in increased homozygosity. For  
486 example, each diploid progenitor of the parents of our fermentation cross was homozygous for  
487 introgression across the genome, meaning that recombination would neither break up nor aid in  
488 purging the introgression in isolated populations of each parent. This suggests that the fate of  
489 introgressions in this species is perhaps more loosely tied to recombination patterns than it  
490 would be in an obligately sexually reproducing species.

491  
492 Despite some limitations to interpretation, this study provides a unique view of the early  
493 dynamics of hybridization and the role of recombination in the presence of introgression. By  
494 focusing not only on the distribution of recombination events but on their specific role in shuffling  
495 alleles, we can more closely connect the physical process of recombination to its role among  
496 other evolutionary forces.

497

498

#### 499 **Acknowledgements**

500 We are grateful to members of the Heil lab, Mohamed Noor, Nathan Layman, and Mark  
501 Smithson for comments on this manuscript. We thank Chris Hittinger and the Portuguese Yeast  
502 Culture Collection for *S. uvarum* strains. This work was supported by NIH R35GM142849 to  
503 CSH.

504

505

506

507

508

509

510 **Figures and Tables**

511

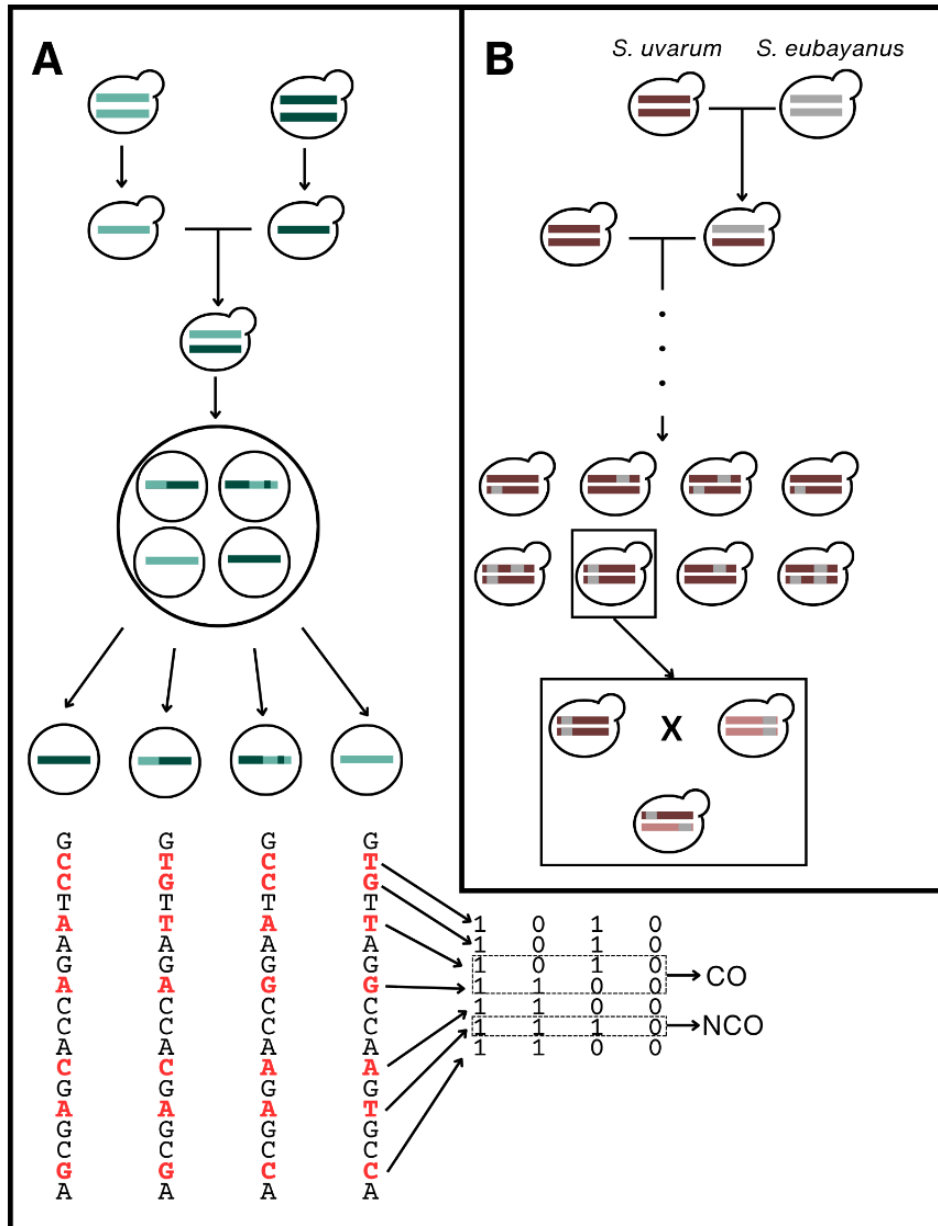

512

513 *Figure 1: (A) Visual representation of each of our crosses. Yeast from each of the parental*  
 514 *strains of a cross are induced to go through meiosis to generate haploids of each mating type.*  
 515 *Subsequently, they are mated, and their diploid offspring are induced to enter meiosis. The*  
 516 *resulting tetrads are manually dissected, and each haploid meiotic product is grown mitotically*

517 *to obtain enough material for DNA extraction and whole genome sequencing. We then call*  
518 *SNPs on the resulting sequences and retain loci with fixed differences between parents. These*  
519 *loci are then coded as 1 or 0 depending on the parent of origin and the CrossOver software*  
520 *detects COs and NCOs. (B) The introgressions we observe in our crosses are due to S.*  
521 *eubayanus hybridizing with S. uvarum, resulting in F1 hybrids that then potentially crossed with*  
522 *other S. uvarum individuals for some number of generations. Eventually, the S. eubayanus*  
523 *ancestry was degraded in the population of S. uvarum until the introgressions we observe today*  
524 *remained, potentially segregating in the population. A similar process likely happened in each of*  
525 *the parental strains we utilized, but with different introgressions remaining in each strain. We*  
526 *then crossed individuals from each strain that were homozygous for the introgression, resulting*  
527 *in offspring that were heterozygous for each introgression. It's important to note that due to the*  
528 *life cycle of Saccharomyces, mitotic recombination likely played an important role in the*  
529 *breakdown of introgressions.*  
530

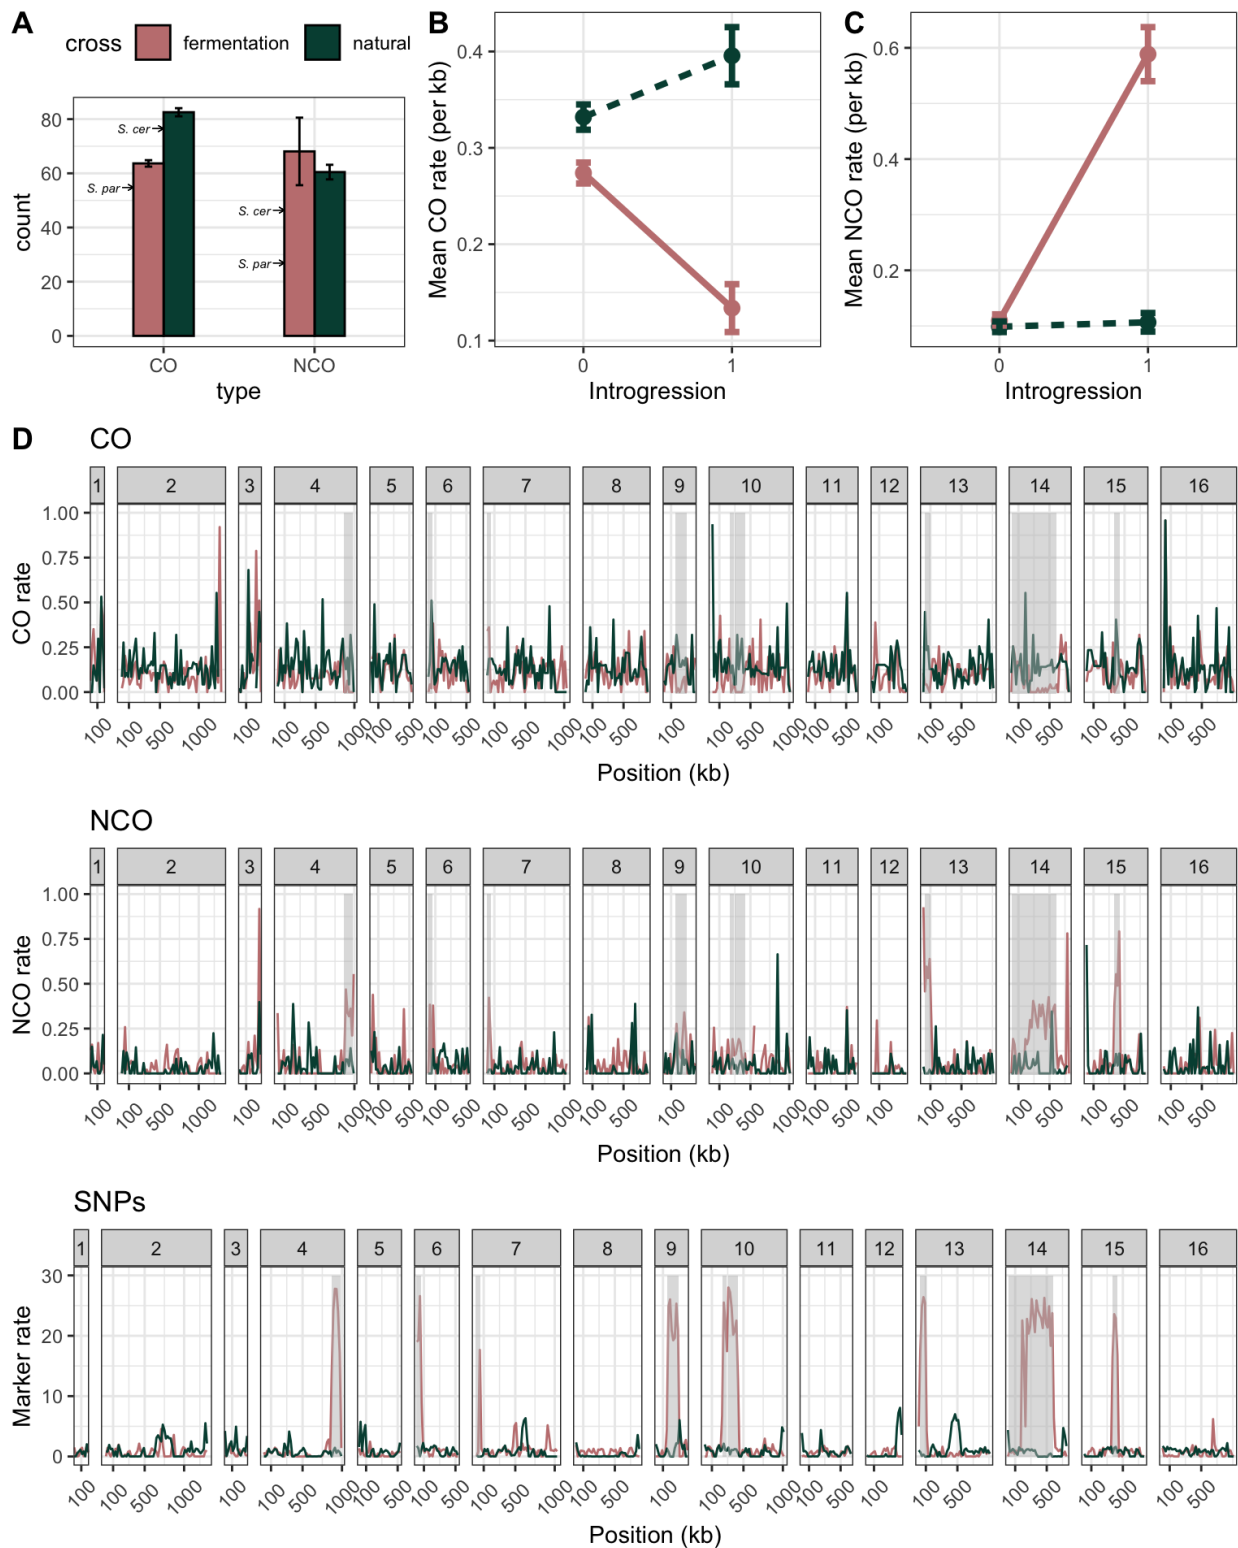

531  
532 *Figure 2: (A) Barplot depicting the number of COs and NCOs detected per meiosis in S. uvarum*  
533 *crosses (green: natural cross; pink: fermentation cross). The error bars represent the standard*

534 *error around the mean. These values are not corrected by resolution. The counts for S.*  
535 *paradoxus and S. cerevisiae are represented by arrows and taken from Liu et al. (2019). (B)*  
536 *Mean CO/kb and (C) NCO/kb by cross and introgression (0 denotes intervals without*  
537 *introgression; 1 denotes introgression present in the fermentation cross. While the natural cross*  
538 *does not contain introgression, the region where introgression is present in the fermentation*  
539 *cross was compared to its syntenic region in the natural cross). Error bars represent the*  
540 *standard error around the mean. (D) S. uvarum chromosomes split into 20kb, non-overlapping*  
541 *windows. CO, NCO, and SNP counts are reported for both crosses (fermentation and natural).*  
542 *Shaded regions denote introgressed regions. CO counts are smoothed when the true location of*  
543 *the CO split could be in one of multiple windows. NCO counts are corrected for marker*  
544 *resolution.*  
545



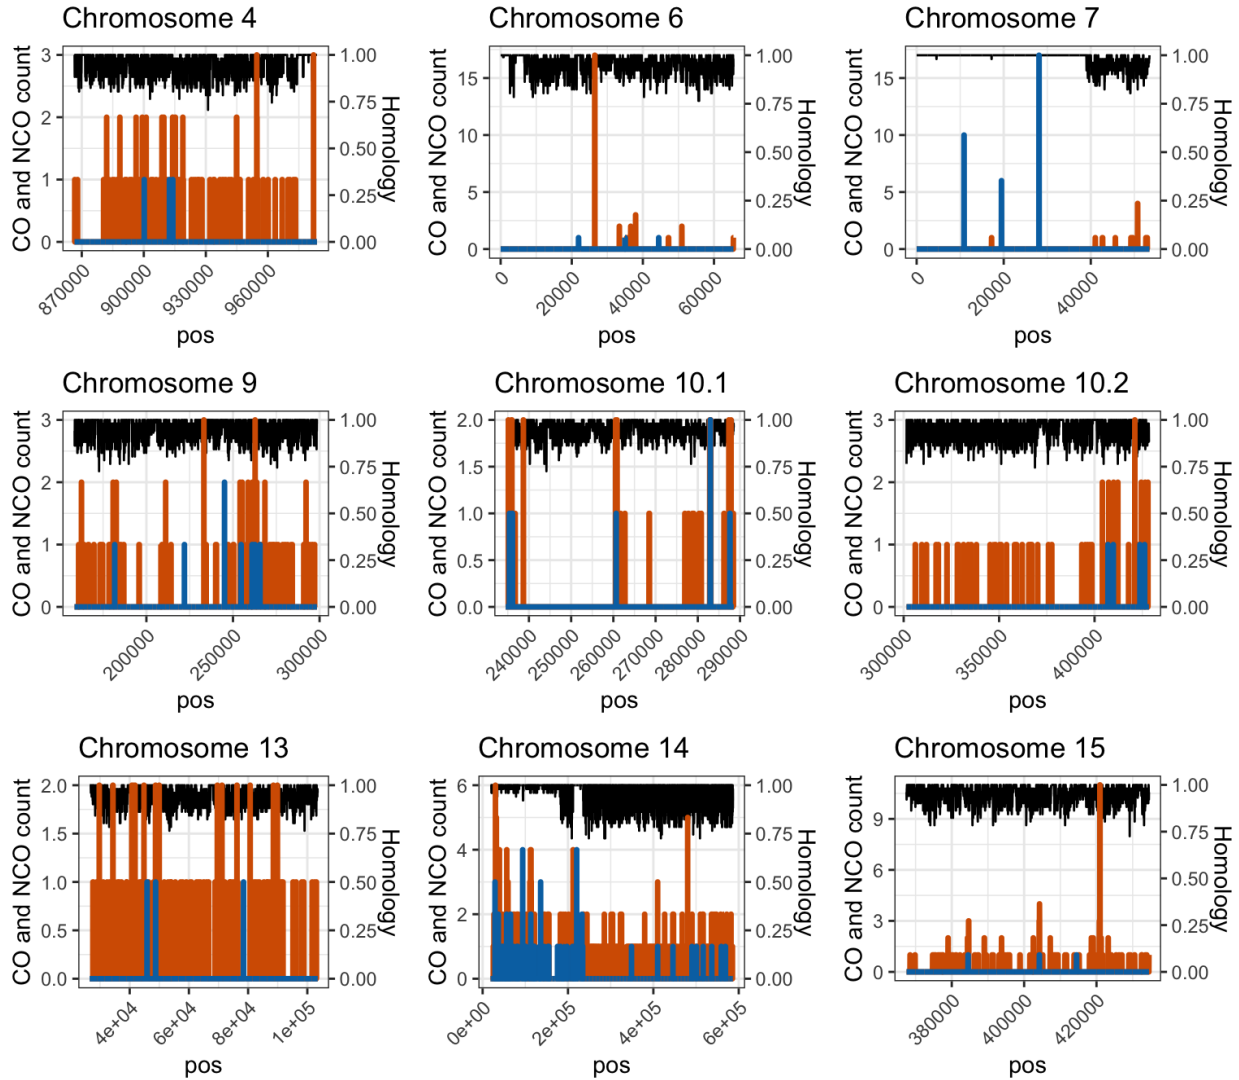

546

547

548 *Figure 3: CO, NCO, and homology in 101bp sliding windows of fermentation cross introgressed*

549 *regions. CO counts are shown in blue, the depth of NCO tracts are shown in orange, and the*

550 *proportion of expected homologous bases between the two fermentation strains is shown in*

551 *black.*

552

**A**

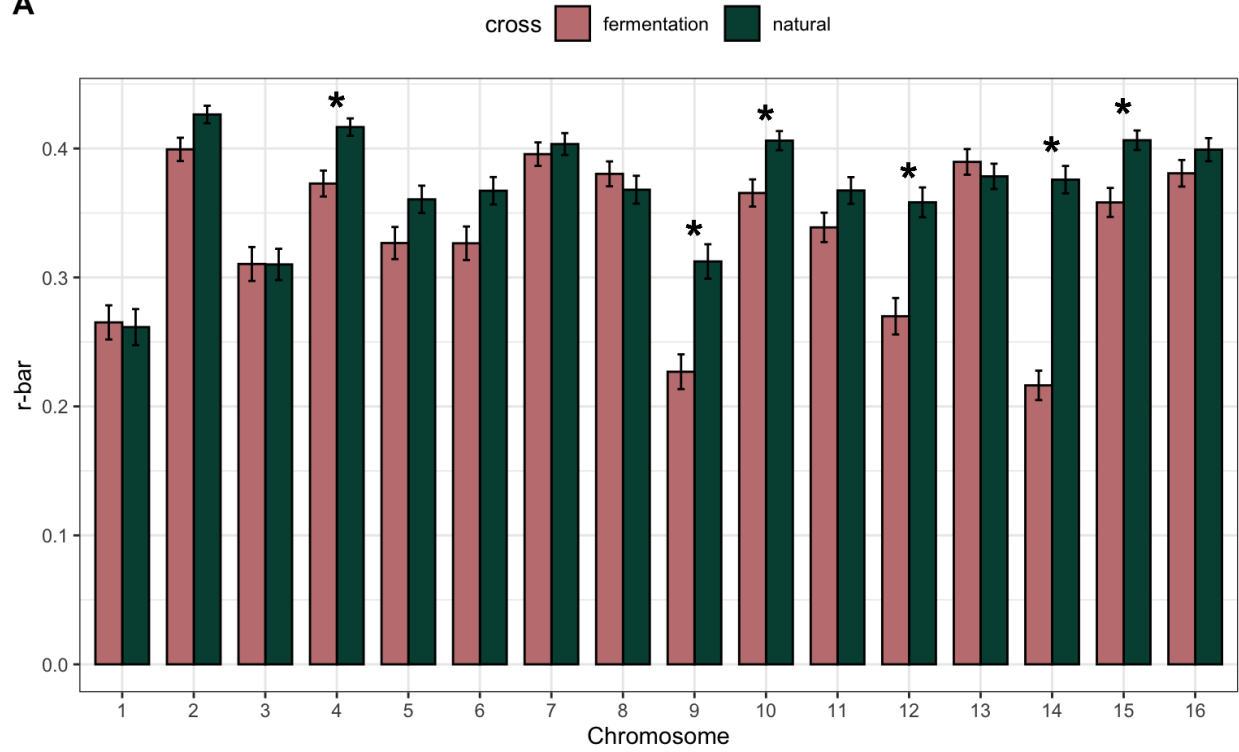

**B**

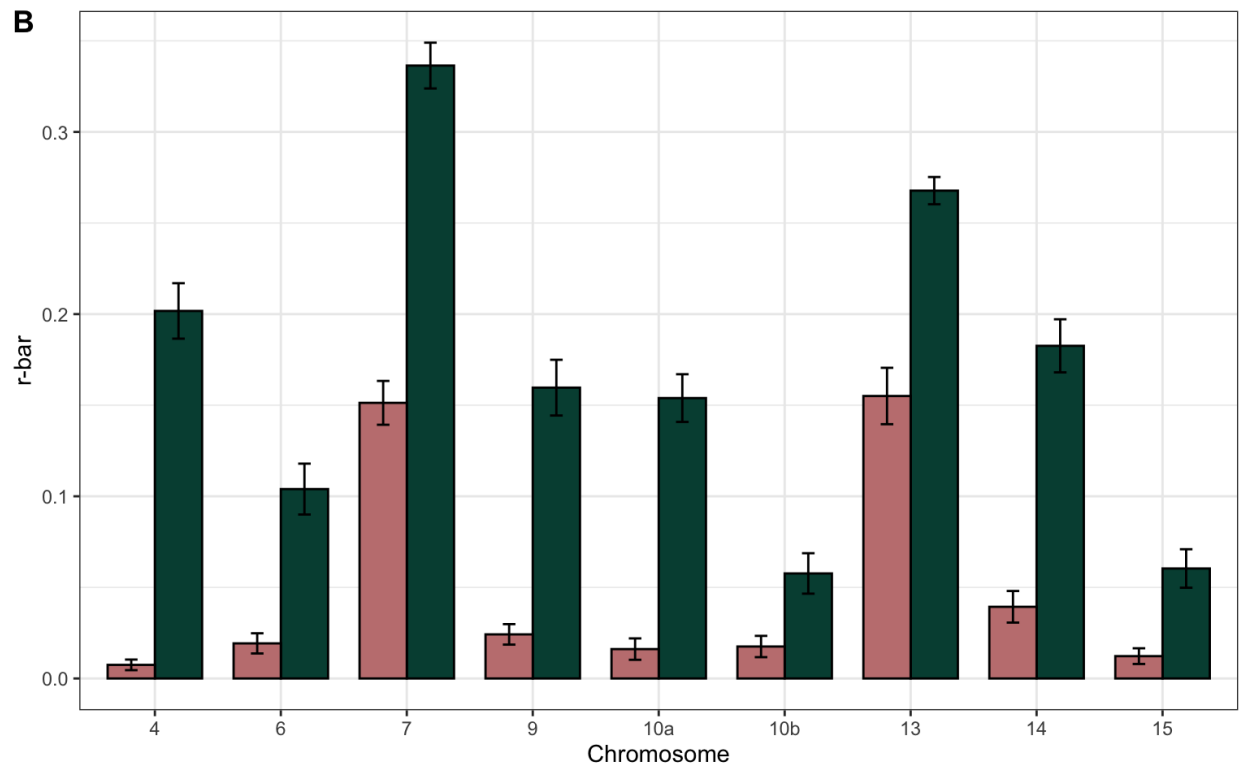

554 *Figure 4: Average  $\bar{r}$  for each chromosome (A) and for each introgressed region (B). Asterisks*  
555 *indicate a significant difference in chromosome  $\bar{r}$  between crosses. All introgressed regions*  
556 *had a significant difference in  $\bar{r}$ . Error bars indicate standard error around the mean.*

557

558 *Table 1: Spearman's correlations of NCOs to homology in introgressed regions of the*  
559 *fermentation cross.*

560

| Chromosome | Start  | End    | Corr    | p<0.001? |
|------------|--------|--------|---------|----------|
| 4          | 866500 | 983774 | -0.1562 | TRUE     |
| 6          | 1      | 65500  | -0.0409 | FALSE    |
| 7          | 1      | 53500  | -0.2102 | TRUE     |
| 9          | 158500 | 298500 | -0.1313 | TRUE     |
| 10         | 234500 | 288500 | -0.0236 | FALSE    |
| 10         | 301500 | 428500 | -0.0990 | TRUE     |
| 13         | 26500  | 103500 | -0.1943 | TRUE     |
| 14         | 18500  | 586500 | -0.2004 | TRUE     |
| 15         | 367500 | 434500 | -0.2076 | TRUE     |

561

562

563

564

565

566

567 *Table 2: Welch two sample t-test results for differences in homology between CO-adjacent*  
568 *regions and NCO-adjacent regions per introgression.*

569

| <b>Introgression</b> | <b>CO mean</b>  |              | <b>NCO mean</b> |               | <b>p-value</b> |
|----------------------|-----------------|--------------|-----------------|---------------|----------------|
|                      | <b>homology</b> | <b>CO SE</b> | <b>homology</b> | <b>NCO SE</b> |                |
| Chromosome 4         | 0.9467          | 0.0148       | 0.9248          | 0.0028        | 0.2760         |
| Chromosome 6         | 0.9663          | 0.0203       | 0.9784          | 0.0017        | 0.5360         |
| Chromosome 7         | 1.0000          | 0.0000       | 0.9838          | 0.0013        | <0.0001        |
| Chromosome 9         | 0.9650          | 0.0102       | 0.9312          | 0.0036        | 0.0109         |
| Chromosome 10 (1)    | 0.9671          | 0.0092       | 0.9476          | 0.0058        | 0.1008         |
| Chromosome 10 (2)    | 0.9400          | 0.0074       | 0.9276          | 0.0040        | 0.1991         |
| Chromosome 13        | 0.9700          | 0.0161       | 0.9304          | 0.0024        | 0.1296         |
| Chromosome 14        | 0.9893          | 0.0026       | 0.9415          | 0.0018        | <0.0001        |
| Chromosome 15        | 0.9317          | 0.0093       | 0.9252          | 0.0029        | 0.5648         |

570

571

572

573

574

575

576

577

578

579 *Table 3: Coefficients of gaussian generalized linear model modeling CO counts per 20kb*  
580 *window.*  
581

|                            | Estimate | Std. Error | t value | Pr(> t ) |
|----------------------------|----------|------------|---------|----------|
| (Intercept)                | -8.9355  | 1.4713     | -6.0732 | 1.70e-09 |
| Introgression              | -3.6343  | 0.6293     | -5.7755 | 9.84e-09 |
| GC                         | 37.9733  | 3.7037     | 10.2528 | < 2e-16  |
| Introgression:crossnatural | 5.2378   | 0.8595     | 6.0941  | 1.49e-09 |

582

583

584 *Table 4: Coefficients of gaussian generalized linear model modeling NCO counts per 20kb*  
585 *window.*  
586

|                            | Estimate | Std. Error | t value  | Pr(> t ) |
|----------------------------|----------|------------|----------|----------|
| (Intercept)                | -1.2261  | 1.4013     | -0.8749  | 0.3818   |
| Introgression              | 9.6354   | 0.5993     | 16.0770  | <2e-16   |
| GC                         | 8.3792   | 3.5275     | 2.3754   | 0.0177   |
| Introgression:crossnatural | -9.6414  | 0.8186     | -11.7780 | <2e-16   |

587

588

589

590

591

592 **References**

593

594 Aguillon, S. M., Dodge, T. O., Preising, G. A., & Schumer, M. (2022). Introgression. *Current*  
595 *Biology*, 32(16), R865–R868. <https://doi.org/10.1016/j.cub.2022.07.004>

596 Albertin, W., Chernova, M., Durrens, P., Guichoux, E., Sherman, D. J., Masneuf-Pomarede, I., &  
597 Marullo, P. (2018). Many interspecific chromosomal introgressions are highly prevalent  
598 in Holarctic *Saccharomyces uvarum* strains found in human-related fermentations.  
599 *Yeast*, 35(1), 141–156. <https://doi.org/10.1002/yea.3248>

600 Almeida, P., Gonçalves, C., Teixeira, S., Libkind, D., Bontrager, M., Masneuf-Pomarède, I.,  
601 Albertin, W., Durrens, P., Sherman, D. J., Marullo, P., Todd Hittinger, C., Gonçalves, P.,  
602 & Sampaio, J. P. (2014). A Gondwanan imprint on global diversity and domestication of  
603 wine and cider yeast *Saccharomyces uvarum*. *Nature Communications*, 5, 4044.  
604 <https://doi.org/10.1038/ncomms5044>

605 Anderson, C. M., Chen, S. Y., Dimon, M. T., Oke, A., DeRisi, J. L., & Fung, J. C. (2011).  
606 ReCombine: A Suite of Programs for Detection and Analysis of Meiotic Recombination in  
607 Whole-Genome Datasets. *PLoS ONE*, 6(10).  
608 <https://doi.org/10.1371/journal.pone.0025509>

609 Arter, M., & Keeney, S. (2023). Divergence and conservation of the meiotic recombination  
610 machinery. *Nature Reviews Genetics*, 1–17. [https://doi.org/10.1038/s41576-023-00669-](https://doi.org/10.1038/s41576-023-00669-8)  
611 8

612 Auton, A., Li, Y. R., Kidd, J., Oliveira, K., Nadel, J., Holloway, J. K., Hayward, J. J., Cohen, P.  
613 E., Grealley, J. M., Wang, J., Bustamante, C. D., & Boyko, A. R. (2013). Genetic  
614 Recombination Is Targeted towards Gene Promoter Regions in Dogs. *PLOS Genetics*,  
615 9(12), e1003984. <https://doi.org/10.1371/journal.pgen.1003984>

616 Barton, N., & Bengtsson, B. O. (1986). The barrier to genetic exchange between hybridising  
617 populations. *Heredity*, 57(3), Article 3. <https://doi.org/10.1038/hdy.1986.135>

- 618 Begun, D. J., & Aquadro, C. F. (1992). Levels of naturally occurring DNA polymorphism  
619 correlate with recombination rates in *D. melanogaster*. *Nature*, *356*(6369), 519–520.  
620 <https://doi.org/10.1038/356519a0>
- 621 Bendixsen, D. P., Frazão, J. G., & Stelkens, R. (2022). *Saccharomyces* yeast hybrids on the  
622 rise. *Yeast*, *39*(1–2), 40–54. <https://doi.org/10.1002/yea.3684>
- 623 Bozdag, G. O., Ono, J., Denton, J. A., Karakoc, E., Hunter, N., Leu, J.-Y., & Greig, D. (2021).  
624 Breaking a species barrier by enabling hybrid recombination. *Current Biology*, *31*(4),  
625 R180–R181. <https://doi.org/10.1016/j.cub.2020.12.038>
- 626 Brand, C. L., Cattani, M. V., Kingan, S. B., Landeen, E. L., & Presgraves, D. C. (2018).  
627 Molecular Evolution at a Meiosis Gene Mediates Species Differences in the Rate and  
628 Patterning of Recombination. *Current Biology: CB*, *28*(8), 1289–1295.e4.  
629 <https://doi.org/10.1016/j.cub.2018.02.056>
- 630 Brandvain, Y., Kenney, A. M., Flagel, L., Coop, G., & Sweigart, A. L. (2014). Speciation and  
631 Introgression between *Mimulus nasutus* and *Mimulus guttatus*. *PLOS Genetics*, *10*(6),  
632 e1004410. <https://doi.org/10.1371/journal.pgen.1004410>
- 633 Brion, C., Legrand, S., Peter, J., Caradec, C., Pflieger, D., Hou, J., Friedrich, A., Llorente, B., &  
634 Schacherer, J. (2017). Variation of the meiotic recombination landscape and properties  
635 over a broad evolutionary distance in yeasts. *PLOS Genetics*, *13*(8), e1006917.  
636 <https://doi.org/10.1371/journal.pgen.1006917>
- 637 Butlin, R. K. (2005). Recombination and speciation. *Molecular Ecology*, *14*(9), 2621–2635.  
638 <https://doi.org/10.1111/j.1365-294X.2005.02617.x>
- 639 Calfee, E., Gates, D., Lorant, A., Perkins, M. T., Coop, G., & Ross-Ibarra, J. (2021). Selective  
640 sorting of ancestral introgression in maize and teosinte along an elevational cline.  
641 *bioRxiv*, 2021.03.05.434040. <https://doi.org/10.1101/2021.03.05.434040>
- 642 Charlesworth, B., Morgan, M. T., & Charlesworth, D. (1993). The effect of deleterious mutations  
643 on neutral molecular variation. *Genetics*, *134*(4), 1289–1303.

- 644 <https://doi.org/10.1093/genetics/134.4.1289>
- 645 Chen, W., & Jinks-Robertson, S. (1999). The role of the mismatch repair machinery in  
646 regulating mitotic and meiotic recombination between diverged sequences in yeast.  
647 *Genetics*, 151(4), 1299–1313.
- 648 Choi, K., Zhao, X., Tock, A. J., Lambing, C., Underwood, C. J., Hardcastle, T. J., Serra, H., Kim,  
649 J., Cho, H. S., Kim, J., Ziolkowski, P. A., Yelina, N. E., Hwang, I., Martienssen, R. A., &  
650 Henderson, I. R. (2018). Nucleosomes and DNA methylation shape meiotic DSB  
651 frequency in *Arabidopsis thaliana* transposons and gene regulatory regions. *Genome*  
652 *Research*, 28(4), 532–546. <https://doi.org/10.1101/gr.225599.117>
- 653 Chovnick, A., Ballantyne, G. H., & Holm, D. G. (1971). Studies on gene conversion and its  
654 relationship to linked exchange in *Drosophila melanogaster*. *Genetics*, 69(2), 179–209.  
655 <https://doi.org/10.1093/genetics/69.2.179>
- 656 Cooper, T. J., Crawford, M. R., Hunt, L. J., Marsolier-Kergoat, M.-C., Llorente, B., & Neale, M. J.  
657 (2021). *Mismatch repair disturbs meiotic class I crossover control* (p. 480418). bioRxiv.  
658 <https://doi.org/10.1101/480418>
- 659 Crown, K. N., Miller, D. E., Sekelsky, J., & Hawley, R. S. (2018). Local Inversion Heterozygosity  
660 Alters Recombination throughout the Genome. *Current Biology: CB*, 28(18), 2984-  
661 2990.e3. <https://doi.org/10.1016/j.cub.2018.07.004>
- 662 Cubillos, F. A., Billi, E., Zörgö, E., Parts, L., Fargier, P., Omholt, S., Blomberg, A., Warringer, J.,  
663 Louis, E. J., & Liti, G. (2011). Assessing the complex architecture of polygenic traits in  
664 diverged yeast populations. *Molecular Ecology*, 20(7), 1401–1413.  
665 <https://doi.org/10.1111/j.1365-294X.2011.05005.x>
- 666 Dagilis, A. J., & Matute, D. R. (2023). The fitness of an introgressing haplotype changes over  
667 the course of divergence and depends on its size and genomic location. *PLOS Biology*,  
668 21(7), e3002185. <https://doi.org/10.1371/journal.pbio.3002185>
- 669 Danecek, P., Bonfield, J. K., Liddle, J., Marshall, J., Ohan, V., Pollard, M. O., Whitwham, A.,



- 670 Keane, T., McCarthy, S. A., Davies, R. M., & Li, H. (2021). Twelve years of SAMtools  
671 and BCFtools. *GigaScience*, *10*(2), giab008. <https://doi.org/10.1093/gigascience/giab008>
- 672 D'Angiolo, M., De Chiara, M., Yue, J.-X., Irizar, A., Stenberg, S., Persson, K., Llored, A., Barré,  
673 B., Schacherer, J., Marangoni, R., Gilson, E., Warringer, J., & Liti, G. (2020). A yeast  
674 living ancestor reveals the origin of genomic introgressions. *Nature*, *587*(7834), Article  
675 7834. <https://doi.org/10.1038/s41586-020-2889-1>
- 676 Dapper, A. L., & Payseur, B. A. (2019). Molecular evolution of the meiotic recombination  
677 pathway in mammals. *Evolution*, *73*(12). <https://doi.org/10.1111/evo.13850>
- 678 Datta, A., Hendrix, M., Lipsitch, M., & Jinks-Robertson, S. (1997). Dual roles for DNA sequence  
679 identity and the mismatch repair system in the regulation of mitotic crossing-over  
680 in yeast. *Proceedings of the National Academy of Sciences of the United States of*  
681 *America*, *94*(18), 9757–9762.
- 682 de Massy, B. (2013). Initiation of Meiotic Recombination: How and Where? Conservation and  
683 Specificities Among Eukaryotes. *Annual Review of Genetics*, *47*(1), 563–599.  
684 <https://doi.org/10.1146/annurev-genet-110711-155423>
- 685 Duranton, M., & Pool, J. E. (2022). Interactions Between Natural Selection and Recombination  
686 Shape the Genomic Landscape of Introgression. *Molecular Biology and Evolution*, *39*(7),  
687 msac122. <https://doi.org/10.1093/molbev/msac122>
- 688 Edelman, N. B., Frandsen, P. B., Miyagi, M., Clavijo, B., Davey, J., Dikow, R. B., García-  
689 Accinelli, G., Van Belleghem, S. M., Patterson, N., Neafsey, D. E., Challis, R., Kumar,  
690 S., Moreira, G. R. P., Salazar, C., Chouteau, M., Counterman, B. A., Papa, R., Blaxter,  
691 M., Reed, R. D., ... Mallet, J. (2019). Genomic architecture and introgression shape a  
692 butterfly radiation. *Science*, *366*(6465), 594–599.  
693 <https://doi.org/10.1126/science.aaw2090>
- 694 Felsenstein, J. (1974). The evolutionary advantage of recombination. *Genetics*, *78*(2), 737–756.
- 695 Gerton, J. L., DeRisi, J., Shroff, R., Lichten, M., Brown, P. O., & Petes, T. D. (2000). Global

- 696 mapping of meiotic recombination hotspots and coldspots in the yeast *Saccharomyces*  
697 *cerevisiae*. *Proceedings of the National Academy of Sciences*, 97(21), 11383–11390.  
698 <https://doi.org/10.1073/pnas.97.21.11383>
- 699 Harfe, B. D., & Jinks-Robertson, S. (2000). Dna Mismatch Repair and Genetic Instability.  
700 *Annual Review of Genetics*, 34(1), 359–399.  
701 <https://doi.org/10.1146/annurev.genet.34.1.359>
- 702 He, Y., Wang, M., Dukowic-Schulze, S., Zhou, A., Tiang, C.-L., Shilo, S., Sidhu, G. K., Eichten,  
703 S., Bradbury, P., Springer, N. M., Buckler, E. S., Levy, A. A., Sun, Q., Pillardy, J.,  
704 Kianian, P. M. A., Kianian, S. F., Chen, C., & Pawlowski, W. P. (2017). Genomic  
705 features shaping the landscape of meiotic double-strand-break hotspots in maize.  
706 *Proceedings of the National Academy of Sciences*, 114(46), 12231–12236.  
707 <https://doi.org/10.1073/pnas.1713225114>
- 708 Hill, W. G., & Robertson, A. (1966). The effect of linkage on limits to artificial selection.  
709 *Genetical Research*, 8(3), 269–294.
- 710 Hilliker, A. J., Harauz, G., Reaume, A. G., Gray, M., Clark, S. H., & Chovnick, A. (1994). Meiotic  
711 gene conversion tract length distribution within the rosy locus of *Drosophila*  
712 *melanogaster*. *Genetics*, 137(4), 1019–1026.  
713 <https://doi.org/10.1093/genetics/137.4.1019>
- 714 Hoffman, C. S., & Winston, F. (1987). A ten-minute DNA preparation from yeast efficiently  
715 releases autonomous plasmids for transformation of *Escherichia coli*. *Gene*, 57(2–3),  
716 267–272. [https://doi.org/10.1016/0378-1119\(87\)90131-4](https://doi.org/10.1016/0378-1119(87)90131-4)
- 717 Hunter, N., Chambers, S. R., Louis, E. J., & Borts, R. H. (1996). The mismatch repair system  
718 contributes to meiotic sterility in an interspecific yeast hybrid. *The EMBO Journal*, 15(7),  
719 1726–1733. <https://doi.org/10.1002/j.1460-2075.1996.tb00518.x>
- 720 Jeffreys, A. J., & May, C. A. (2004). Intense and highly localized gene conversion activity in  
721 human meiotic crossover hot spots. *Nature Genetics*, 36(2), Article 2.

- 722 <https://doi.org/10.1038/ng1287>
- 723 Judd, S. R., & Petes, T. D. (1988). Physical Lengths of Meiotic and Mitotic Gene Conversion  
724 Tracts in *Saccharomyces Cerevisiae*. *Genetics*, 118(3), 401.  
725 <https://doi.org/10.1093/genetics/118.3.401>
- 726 Keeney, S. (2001). Mechanism and control of meiotic recombination initiation. *Current Topics in*  
727 *Developmental Biology*, 52, 1–53. [https://doi.org/10.1016/s0070-2153\(01\)52008-6](https://doi.org/10.1016/s0070-2153(01)52008-6)
- 728 Kiktev, D. A., Sheng, Z., Lobachev, K. S., & Petes, T. D. (2018). GC content elevates mutation  
729 and recombination rates in the yeast *Saccharomyces cerevisiae*. *Proceedings of the*  
730 *National Academy of Sciences*, 115(30), E7109–E7118.  
731 <https://doi.org/10.1073/pnas.1807334115>
- 732 Kong, A., Thorleifsson, G., Stefansson, H., Masson, G., Helgason, A., Gudbjartsson, D. F.,  
733 Jonsdottir, G. M., Gudjonsson, S. A., Sverrisson, S., Thorlacius, T., Jonasdottir, A.,  
734 Hardarson, G. A., Palsson, S. T., Frigge, M. L., Gulcher, J. R., Thorsteinsdottir, U., &  
735 Stefansson, K. (2008). Sequence Variants in the RNF212 Gene Associate with Genome-  
736 Wide Recombination Rate. *Science*, 319(5868), 1398–1401.  
737 <https://doi.org/10.1126/science.1152422>
- 738 Korunes, K. L., & Noor, M. A. F. (2017). Gene conversion and linkage: Effects on genome  
739 evolution and speciation. *Molecular Ecology*, 26(1), 351–364.  
740 <https://doi.org/10.1111/mec.13736>
- 741 Korunes, K. L., & Noor, M. A. F. (2019). Pervasive gene conversion in chromosomal inversion  
742 heterozygotes. *Molecular Ecology*, 28(6), 1302–1315. <https://doi.org/10.1111/mec.14921>
- 743 Lam, I., & Keeney, S. (2015). Nonparadoxical evolutionary stability of the recombination  
744 initiation landscape in yeast. *Science*, 350(6263), 932–937.  
745 <https://doi.org/10.1126/science.aad0814>
- 746 Langdon, Q. K., Peris, D., Baker, E. P., Opulente, D. A., Nguyen, H.-V., Bond, U., Gonçalves,  
747 P., Sampaio, J. P., Libkind, D., & Hittinger, C. T. (2019). Fermentation innovation

- 748 through complex hybridization of wild and domesticated yeasts. *Nature Ecology &*  
749 *Evolution*, 1–11. <https://doi.org/10.1038/s41559-019-0998-8>
- 750 Langdon, Q. K., Peris, D., Eizaguirre, J. I., Opulente, D. A., Buh, K. V., Sylvester, K., Jarzyna,  
751 M., Rodríguez, M. E., Lopes, C. A., Libkind, D., & Hittinger, C. T. (2020). Postglacial  
752 migration shaped the genomic diversity and global distribution of the wild ancestor of  
753 lager-brewing hybrids. *PLOS Genetics*, 16(4), e1008680.  
754 <https://doi.org/10.1371/journal.pgen.1008680>
- 755 Layer, R. M., Chiang, C., Quinlan, A. R., & Hall, I. M. (2014). LUMPY: A probabilistic framework  
756 for structural variant discovery. *Genome Biology*, 15(6), R84. [https://doi.org/10.1186/gb-](https://doi.org/10.1186/gb-2014-15-6-r84)  
757 [2014-15-6-r84](https://doi.org/10.1186/gb-2014-15-6-r84)
- 758 Li, H., & Durbin, R. (2009). Fast and accurate short read alignment with Burrows-Wheeler  
759 transform. *Bioinformatics (Oxford, England)*, 25(14), 1754–1760.  
760 <https://doi.org/10.1093/bioinformatics/btp324>
- 761 Li, L., Jean, M., & Belzile, F. (2006). The impact of sequence divergence and DNA mismatch  
762 repair on homeologous recombination in Arabidopsis. *The Plant Journal: For Cell and*  
763 *Molecular Biology*, 45(6), 908–916. <https://doi.org/10.1111/j.1365-313X.2006.02657.x>
- 764 Liu, H., Huang, J., Sun, X., Li, J., Hu, Y., Yu, L., Liti, G., Tian, D., Hurst, L. D., & Yang, S.  
765 (2018). Tetrad analysis in plants and fungi finds large differences in gene conversion  
766 rates but no GC bias. *Nature Ecology & Evolution*, 2(1), Article 1.  
767 <https://doi.org/10.1038/s41559-017-0372-7>
- 768 Liu, H., Maclean, C. J., & Zhang, J. (2019). Evolution of the Yeast Recombination Landscape.  
769 *Molecular Biology and Evolution*, 36(2), 412–422.  
770 <https://doi.org/10.1093/molbev/msy233>
- 771 Magwene, P. M., Kayıkcı, Ö., Granek, J. A., Reininga, J. M., Scholl, Z., & Murray, D. (2011).  
772 Outcrossing, mitotic recombination, and life-history trade-offs shape genome evolution in  
773 *Saccharomyces cerevisiae*. *Proceedings of the National Academy of Sciences*, 108(5),

- 774 1987–1992. <https://doi.org/10.1073/pnas.1012544108>
- 775 Mancera, E., Bourgon, R., Brozzi, A., Huber, W., & Steinmetz, L. M. (2008). High-resolution  
776 mapping of meiotic crossovers and non-crossovers in yeast. *Nature*, *454*(7203), 479–  
777 485. <https://doi.org/10.1038/nature07135>
- 778 Marsolier-Kergoat, M.-C., & Yeramian, E. (2009). GC Content and Recombination: Reassessing  
779 the Causal Effects for the *Saccharomyces cerevisiae* Genome. *Genetics*, *183*(1), 31–38.  
780 <https://doi.org/10.1534/genetics.109.105049>
- 781 Martin, S. H., Davey, J. W., Salazar, C., & Jiggins, C. D. (2019). Recombination rate variation  
782 shapes barriers to introgression across butterfly genomes. *PLOS Biology*, *17*(2),  
783 e2006288. <https://doi.org/10.1371/journal.pbio.2006288>
- 784 McDonald, M. J., Rice, D. P., & Desai, M. M. (2016). Sex speeds adaptation by altering the  
785 dynamics of molecular evolution. *Nature*, *531*(7593), 233–236.  
786 <https://doi.org/10.1038/nature17143>
- 787 McGaugh, S. E., Heil, C. S. S., Manzano-Winkler, B., Loewe, L., Goldstein, S., Himmel, T. L., &  
788 Noor, M. A. F. (2012). Recombination Modulates How Selection Affects Linked Sites in  
789 *Drosophila*. *PLOS Biology*, *10*(11), e1001422.  
790 <https://doi.org/10.1371/journal.pbio.1001422>
- 791 McKenna, A., Hanna, M., Banks, E., Sivachenko, A., Cibulskis, K., Kernytsky, A., Garimella, K.,  
792 Altshuler, D., Gabriel, S., Daly, M., & DePristo, M. A. (2010). The Genome Analysis  
793 Toolkit: A MapReduce framework for analyzing next-generation DNA sequencing data.  
794 *Genome Research*, *20*(9), 1297–1303. <https://doi.org/10.1101/gr.107524.110>
- 795 Miller, D. E., Smith, C. B., Kazemi, N. Y., Cockrell, A. J., Arvanitakis, A. V., Blumenstiel, J. P.,  
796 Jaspersen, S. L., & Hawley, R. S. (2016). Whole-Genome Analysis of Individual Meiotic  
797 Events in *Drosophila melanogaster* Reveals That Noncrossover Gene Conversions Are  
798 Insensitive to Interference and the Centromere Effect. *Genetics*, *203*(1), 159–171.  
799 <https://doi.org/10.1534/genetics.115.186486>

- 800 Moran, B. M., Payne, C., Langdon, Q., Powell, D. L., Brandvain, Y., & Schumer, M. (2021). The  
801 genomic consequences of hybridization. *eLife*, *10*, e69016.  
802 <https://doi.org/10.7554/eLife.69016>
- 803 Murdoch, B., Owen, N., Shirley, S., Crumb, S., Broman, K. W., & Hassold, T. (2010). Multiple  
804 loci contribute to genome-wide recombination levels in male mice. *Mammalian Genome*,  
805 *21*(11), 550–555. <https://doi.org/10.1007/s00335-010-9303-5>
- 806 Nachman Michael W. & Payseur Bret A. (2012). Recombination rate variation and speciation:  
807 Theoretical predictions and empirical results from rabbits and mice. *Philosophical*  
808 *Transactions of the Royal Society B: Biological Sciences*, *367*(1587), 409–421.  
809 <https://doi.org/10.1098/rstb.2011.0249>
- 810 Nespolo, R. F., Villarroel, C. A., Oporto, C. I., Tapia, S. M., Vega-Macaya, F., Urbina, K., Chiara,  
811 M. D., Mozzachiodi, S., Mikhalev, E., Thompson, D., Larrondo, L. F., Saenz-Agudelo, P.,  
812 Liti, G., & Cubillos, F. A. (2020). An Out-of-Patagonia migration explains the worldwide  
813 diversity and distribution of *Saccharomyces eubayanus* lineages. *PLOS Genetics*, *16*(5),  
814 e1008777. <https://doi.org/10.1371/journal.pgen.1008777>
- 815 Pan, J., Sasaki, M., Kniewel, R., Murakami, H., Blitzblau, H. G., Tischfield, S. E., Zhu, X., Neale,  
816 M. J., Jasin, M., Socci, N. D., Hochwagen, A., & Keeney, S. (2011). A Hierarchical  
817 Combination of Factors Shapes the Genome-wide Topography of Yeast Meiotic  
818 Recombination Initiation. *Cell*, *144*(5), 719–731.  
819 <https://doi.org/10.1016/j.cell.2011.02.009>
- 820 Pool, J. E. (2015). The Mosaic Ancestry of the *Drosophila* Genetic Reference Panel and the *D.*  
821 *melanogaster* Reference Genome Reveals a Network of Epistatic Fitness Interactions.  
822 *Molecular Biology and Evolution*, *32*(12), 3236–3251.  
823 <https://doi.org/10.1093/molbev/msv194>
- 824 Raffoux, X., Bourge, M., Dumas, F., Martin, O. C., & Falque, M. (2018). Role of Cis, Trans, and  
825 Inbreeding Effects on Meiotic Recombination in *Saccharomyces cerevisiae*. *Genetics*,

- 826           210(4), 1213–1226. <https://doi.org/10.1534/genetics.118.301644>
- 827 Ravinet, M., Yoshida, K., Shigenobu, S., Toyoda, A., Fujiyama, A., & Kitano, J. (2018). The  
828 genomic landscape at a late stage of stickleback speciation: High genomic divergence  
829 interspersed by small localized regions of introgression. *PLOS Genetics*, 14(5),  
830 e1007358. <https://doi.org/10.1371/journal.pgen.1007358>
- 831 Robinson, J. T., Thorvaldsdóttir, H., Winckler, W., Guttman, M., Lander, E. S., Getz, G., &  
832 Mesirov, J. P. (2011). Integrative genomics viewer. *Nature Biotechnology*, 29(1), 24–26.  
833 <https://doi.org/10.1038/nbt.1754>
- 834 Rockman, M. V., & Kruglyak, L. (2009). Recombinational Landscape and Population Genomics  
835 of *Caenorhabditis elegans*. *PLOS Genetics*, 5(3), e1000419.  
836 <https://doi.org/10.1371/journal.pgen.1000419>
- 837 Rogers, D. W., McConnell, E., Ono, J., & Greig, D. (2018). Spore-autonomous fluorescent  
838 protein expression identifies meiotic chromosome mis-segregation as the principal cause  
839 of hybrid sterility in yeast. *PLOS Biology*, 16(11), e2005066.  
840 <https://doi.org/10.1371/journal.pbio.2005066>
- 841 Ruderfer, D. M., Pratt, S. C., Seidel, H. S., & Kruglyak, L. (2006). Population genomic analysis  
842 of outcrossing and recombination in yeast. *Nature Genetics*, 38(9), Article 9.  
843 <https://doi.org/10.1038/ng1859>
- 844 Scannell, D. R., Zill, O. A., Rokas, A., Payen, C., Dunham, M. J., Eisen, M. B., Rine, J.,  
845 Johnston, M., & Hittinger, C. T. (2011). The Awesome Power of Yeast Evolutionary  
846 Genetics: New Genome Sequences and Strain Resources for the *Saccharomyces sensu*  
847 *stricto* Genus. *G3: Genes, Genomes, Genetics*, 1(1), 11–25.  
848 <https://doi.org/10.1534/g3.111.000273>
- 849 Schaeffer, S. W., & Anderson, W. W. (2005). Mechanisms of Genetic Exchange Within the  
850 Chromosomal Inversions of *Drosophila pseudoobscura*. *Genetics*, 171(4), 1729–1739.  
851 <https://doi.org/10.1534/genetics.105.041947>

- 852 Schumer, M., Xu, C., Powell, D. L., Durvasula, A., Skov, L., Holland, C., Blazier, J. C.,  
853 Sankararaman, S., Andolfatto, P., Rosenthal, G. G., & Przeworski, M. (2018). Natural  
854 selection interacts with recombination to shape the evolution of hybrid genomes.  
855 *Science*, 360(6389), 656–660. <https://doi.org/10.1126/science.aar3684>
- 856 Shi, J., Wolf, S. E., Burke, J. M., Presting, G. G., Ross-Ibarra, J., & Dawe, R. K. (2010).  
857 Widespread Gene Conversion in Centromere Cores. *PLoS Biology*, 8(3), e1000327.  
858 <https://doi.org/10.1371/journal.pbio.1000327>
- 859 Singhal, S., Leffler, E. M., Sannareddy, K., Turner, I., Venn, O., Hooper, D. M., Strand, A. I., Li,  
860 Q., Raney, B., Balakrishnan, C. N., Griffith, S. C., McVean, G., & Przeworski, M. (2015).  
861 Stable recombination hotspots in birds. *Science (New York, N. Y.)*, 350(6263), 928–932.  
862 <https://doi.org/10.1126/science.aad0843>
- 863 Smith, J. M., & Haigh, J. (1974). The hitch-hiking effect of a favourable gene. *Genetical*  
864 *Research*, 23(1), 23–35.
- 865 Smukowski, C. S., & Noor, M. a. F. (2011). Recombination rate variation in closely related  
866 species. *Heredity*, 107(6), 496–508. <https://doi.org/10.1038/hdy.2011.44>
- 867 Smukowski Heil, C. S., Ellison, C., Dubin, M., & Noor, M. A. F. (2015). Recombining without  
868 Hotspots: A Comprehensive Evolutionary Portrait of Recombination in Two Closely  
869 Related Species of *Drosophila*. *Genome Biology and Evolution*, 7(10), 2829–2842.  
870 <https://doi.org/10.1093/gbe/evv182>
- 871 Stapley, J., Feulner, P. G. D., Johnston, S. E., Santure, A. W., & Smadja, C. M. (2017).  
872 Variation in recombination frequency and distribution across eukaryotes: Patterns and  
873 processes. *Philosophical Transactions of the Royal Society B: Biological Sciences*,  
874 372(1736), 20160455. <https://doi.org/10.1098/rstb.2016.0455>
- 875 Stelkens, R., & Bendixsen, D. P. (2022). The evolutionary and ecological potential of yeast  
876 hybrids. *Current Opinion in Genetics & Development*, 76, 101958.  
877 <https://doi.org/10.1016/j.gde.2022.101958>



- 878 Talbert, P. B., & Henikoff, S. (2010). Centromeres Convert but Don't Cross. *PLOS Biology*, 8(3),  
879 e1000326. <https://doi.org/10.1371/journal.pbio.1000326>
- 880 Tellini, N., De Chiara, M., Mozzachiodi, S., Tattini, L., Vischioni, C., Naumova, E., Warringer, J.,  
881 Bergström, A., & Liti, G. (2023). *Ancient and recent origins of shared polymorphisms in*  
882 *yeas*. <https://doi.org/10.21203/rs.3.rs-2573222/v1>
- 883 Tsai, I. J., Burt, A., & Koufopanou, V. (2010). Conservation of recombination hotspots in yeast.  
884 *Proceedings of the National Academy of Sciences*.  
885 <https://doi.org/10.1073/pnas.0908774107>
- 886 Veller, C., Edelman, N. B., Muralidhar, P., & Nowak, M. A. (2023). Recombination and selection  
887 against introgressed DNA. *Evolution*, 77(4), 1131–1144.  
888 <https://doi.org/10.1093/evolut/qpad021>
- 889 Veller, C., Kleckner, N., & Nowak, M. A. (2019). A rigorous measure of genome-wide genetic  
890 shuffling that takes into account crossover positions and Mendel's second law.  
891 *Proceedings of the National Academy of Sciences of the United States of America*,  
892 116(5), 1659–1668. <https://doi.org/10.1073/pnas.1817482116>
- 893 Welz-Voegelé, C., & Jinks-Robertson, S. (2008). Sequence Divergence Impedes Crossover  
894 More Than Noncrossover Events During Mitotic Gap Repair in Yeast. *Genetics*, 179(3),  
895 1251–1262. <https://doi.org/10.1534/genetics.108.090233>
- 896 Wijnker, E., Velikkakam James, G., Ding, J., Becker, F., Klasen, J. R., Rawat, V., Rowan, B. A.,  
897 de Jong, D. F., de Snoo, C. B., Zapata, L., Huettel, B., de Jong, H., Ossowski, S.,  
898 Weigel, D., Koornneef, M., Keurentjes, J. J., & Schneeberger, K. (2013). The genomic  
899 landscape of meiotic crossovers and gene conversions in *Arabidopsis thaliana*. *eLife*, 2,  
900 e01426. <https://doi.org/10.7554/eLife.01426>
- 901 Yang, F., Silber, S., Leu, N. A., Oates, R. D., Marszalek, J. D., Skaletsky, H., Brown, L. G.,  
902 Rozen, S., Page, D. C., & Wang, P. J. (2015). TEX11 is mutated in infertile men with  
903 azoospermia and regulates genome-wide recombination rates in mouse. *EMBO*

904            *Molecular Medicine*, 7(9), 1198–1210. <https://doi.org/10.15252/emmm.201404967>

905    Zelkowski, M., Olson, M. A., Wang, M., & Pawlowski, W. (2019). Diversity and Determinants of

906            Meiotic Recombination Landscapes. *Trends in Genetics*, 35(5), 359–370.

907            <https://doi.org/10.1016/j.tig.2019.02.002>

908    Zeyl, C. W., & Otto, S. P. (2007). A short history of recombination in yeast. *Trends in Ecology &*

909            *Evolution*, 22(5), 223–225. <https://doi.org/10.1016/j.tree.2007.02.005>

910

911

912
